# Supplementary material for: Functional male accessory glands and fertility in Drosophila require novel ecdysone receptor
Source: PLOS journal article supplement (doi:10.1371/journal.pgen.1006788), 2017-05-11

# Larval tissue

Brain ganglia

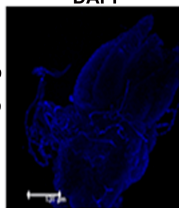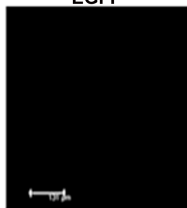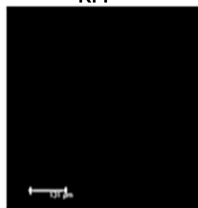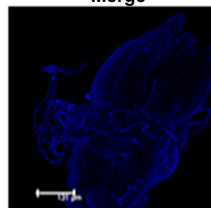

Genital disc

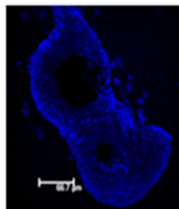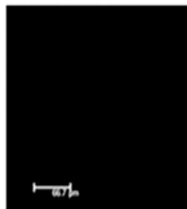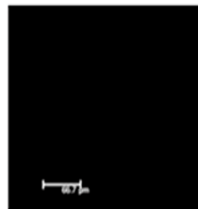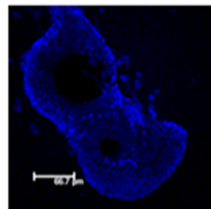

Gonads

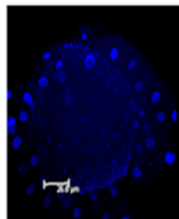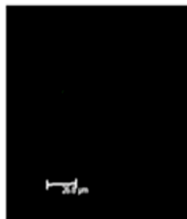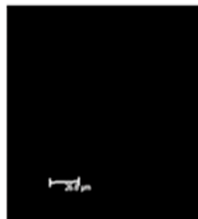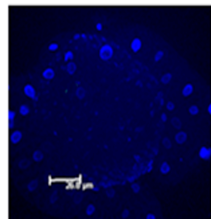

Testis

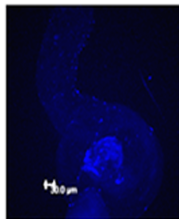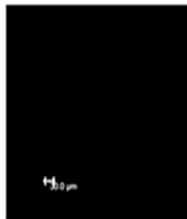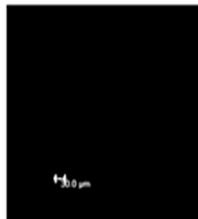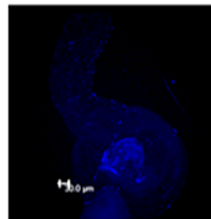

Accessory gland

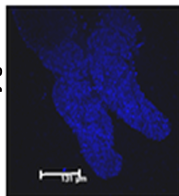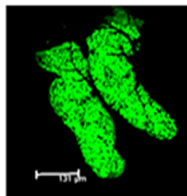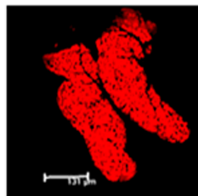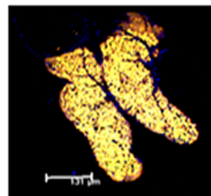

# Adult tissue

DAPI

EGFP

RFP

Merge



Supplement: S2 (10.1371/journal.pgen.1006788.s002) [file journal.pgen.1006788.s002]
